# Supplementary material for: Long-term soil warming decreases microbial phosphorus utilization by increasing abiotic phosphorus sorption and phosphorus losses
Source: Springer Nature journal article supplement (doi:10.1038/s41467-023-36527-8), 2023-02-16
Supplement: MOESM1 [file 41467_2023_36527_MOESM1_ESM.pdf]

**Supplementary Fig. 1 | X-ray diffractograms**

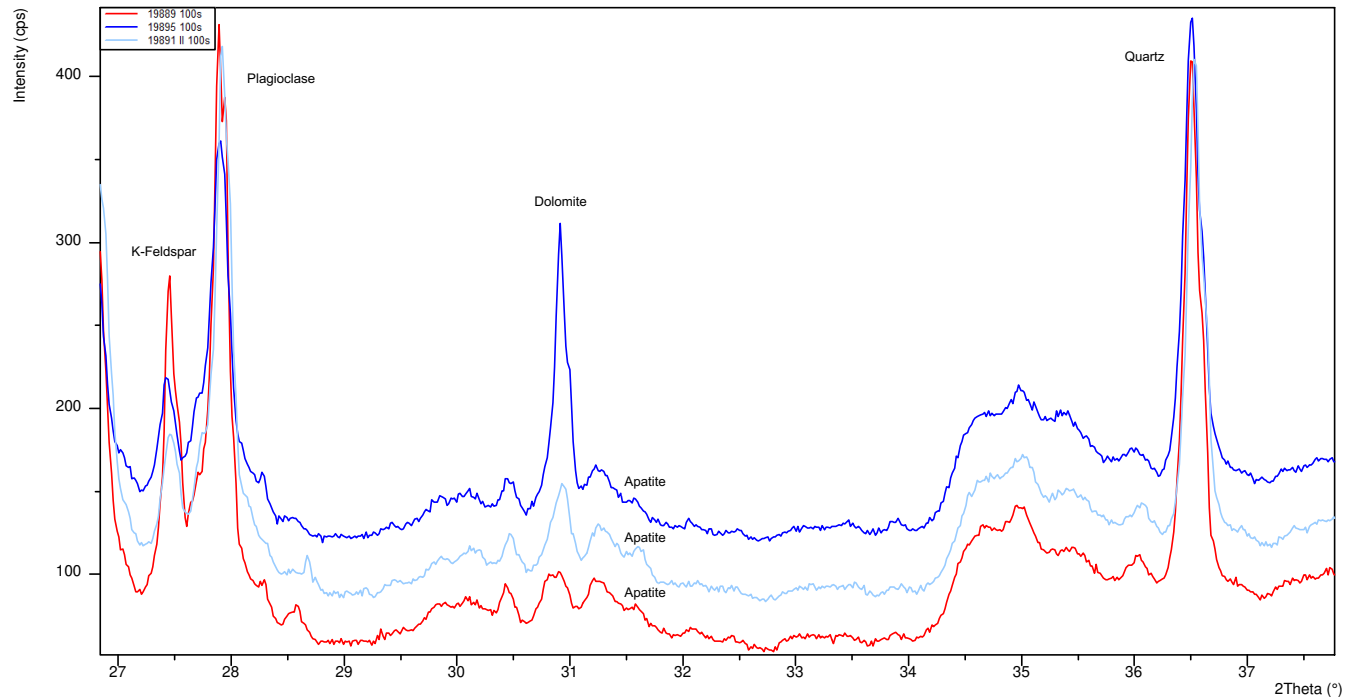

X-ray diffractograms from three out of twenty-four samples are presented for visibility reasons. Other diffractograms are available upon request.
